# Supplementary material for: Web-Based Learning for Emergency Airway Management in Anesthesia Residency Training
Source: Hindawi journal article supplement (doi:10.1155/2015/971406), 2015-01-01
Supplement: f1 [file 971406.f1.pdf]

## **SUPPLEMENTAL CONTENT**

- 1. Pre-module survey**
- 2. Post-module survey**
- 3. Supplemental information on construction of modules, with accompanying figures i to iii .**

### Pre-module Survey

1) Please rate the effectiveness of the following strategies as preparation to manage emergency airways while on call:

**a) Teaching sessions, such as Academic day**

|            |   |   |          |   |   |         |
|------------|---|---|----------|---|---|---------|
| 1          | 2 | 3 | 4        | 5 | 6 | 7       |
| Not at all |   |   | Adequate |   |   | Optimal |

**b) Day list experience with faculty**

|            |   |   |          |   |   |         |
|------------|---|---|----------|---|---|---------|
| 1          | 2 | 3 | 4        | 5 | 6 | 7       |
| Not at all |   |   | Adequate |   |   | Optimal |

**c) On call experience with faculty**

|            |   |   |          |   |   |         |
|------------|---|---|----------|---|---|---------|
| 1          | 2 | 3 | 4        | 5 | 6 | 7       |
| Not at all |   |   | Adequate |   |   | Optimal |

**d) Self-directed learning**

|            |   |   |          |   |   |         |
|------------|---|---|----------|---|---|---------|
| 1          | 2 | 3 | 4        | 5 | 6 | 7       |
| Not at all |   |   | Adequate |   |   | Optimal |

**e) Simulation training**

|   |   |   |   |   |   |   |
|---|---|---|---|---|---|---|
| 1 | 2 | 3 | 4 | 5 | 6 | 7 |
|---|---|---|---|---|---|---|

Not at all

Adequate

Optimal

**f) Online teaching modules**

1

2

3

4

5

6

7

Not at all

Adequate

Optimal

**g) Other: \_\_\_\_\_**

1

2

3

4

5

6

7

Not at all

Adequate

Optimal

### **Post- Module Survey**

1) Please rate the following with respect to the module:

**a) Ease of use**

|            |   |   |          |   |   |         |
|------------|---|---|----------|---|---|---------|
| 1          | 2 | 3 | 4        | 5 | 6 | 7       |
| Not at all |   |   | Adequate |   |   | Optimal |

**b) Interpretability of cases and questions**

|            |   |   |          |   |   |         |
|------------|---|---|----------|---|---|---------|
| 1          | 2 | 3 | 4        | 5 | 6 | 7       |
| Not at all |   |   | Adequate |   |   | Optimal |

**c) Visual aid**

|            |   |   |          |   |   |         |
|------------|---|---|----------|---|---|---------|
| 1          | 2 | 3 | 4        | 5 | 6 | 7       |
| Not at all |   |   | Adequate |   |   | Optimal |

2) Based on the time spent on these cases, how many cases would you realistically do online as preparation for managing emergency airway management:

- a) 1-2 more cases per year
- b) 3-5 more cases per year
- c) 6-10 more cases per year
- d) 11 + more cases per year

3) Please rate the effectiveness of the following strategies as preparation to manage emergency airways:

**a) Teaching sessions, such as Academic day**

|            |   |   |          |   |   |         |
|------------|---|---|----------|---|---|---------|
| 1          | 2 | 3 | 4        | 5 | 6 | 7       |
| Not at all |   |   | Adequate |   |   | Optimal |

**b) Day list experience with faculty**

|            |   |   |          |   |   |         |
|------------|---|---|----------|---|---|---------|
| 1          | 2 | 3 | 4        | 5 | 6 | 7       |
| Not at all |   |   | Adequate |   |   | Optimal |

**c) On call experience with faculty**

|            |   |   |          |   |   |         |
|------------|---|---|----------|---|---|---------|
| 1          | 2 | 3 | 4        | 5 | 6 | 7       |
| Not at all |   |   | Adequate |   |   | Optimal |

**d) Self-directed learning**

|            |   |   |          |   |   |         |
|------------|---|---|----------|---|---|---------|
| 1          | 2 | 3 | 4        | 5 | 6 | 7       |
| Not at all |   |   | Adequate |   |   | Optimal |

**e) Simulation training**

|            |   |   |          |   |   |         |
|------------|---|---|----------|---|---|---------|
| 1          | 2 | 3 | 4        | 5 | 6 | 7       |
| Not at all |   |   | Adequate |   |   | Optimal |

**f) Online teaching modules**

|            |   |   |          |   |   |         |
|------------|---|---|----------|---|---|---------|
| 1          | 2 | 3 | 4        | 5 | 6 | 7       |
| Not at all |   |   | Adequate |   |   | Optimal |

**g) Other:** \_\_\_\_\_

|            |   |   |          |   |   |         |
|------------|---|---|----------|---|---|---------|
| 1          | 2 | 3 | 4        | 5 | 6 | 7       |
| Not at all |   |   | Adequate |   |   | Optimal |

### Supplemental information on construction of modules

The modules were initially constructed in text format using PowerPoint and then built as interactive WBL modules with Articulate Storyline® software, with the help of an instructional designer at McMaster University.

The modules were uploaded by the instructional designer to “Avenue to Learn”, an online learning management system used at McMaster University. The pre- and post- module surveys and knowledge tests were then created in Avenue to Learn.

---

**avenue to learn**  Content  Resources ▼  Communication ▼  Assessments ▼  ePortfolio  Edit Course

#### Emergency Airway Management

Hello DEVON - you have successfully logged in to the course!

On the day of the study (Nov. 7 onwards), content and instructions for participating will become available in the space below.

**NOTE:** To return to this page at any time, please click on the 'Emergency Airway Ma...' link in the black bar at the top of the page next to "My Home"

Thank you for your participation in the study. Please complete the following tasks in the order listed:

**Step 1: Complete the pre-module test and survey**

[Pre-module test](#)

[Pre-module survey](#)

**Step 2: View the modules**

Considerations and Airway Management in the Burn Patient:

[View 'Considerations and Airway Management in the Burn Patient' module](#)

Considerations in Airway Management in Maxillofacial Trauma:

[View 'Considerations in Airway Management in Maxillofacial Trauma' module](#)

**Step 3: Complete the post-module test and post-module survey**

[Post-module test](#)

[Post-module survey](#)

\*\*\*\*\*

If you experience any technical difficulties, please contact [rivet@mcmaster.ca](mailto:rivet@mcmaster.ca)

fig i. Emergency Airway Management course menu from Avenue to Learn® learning management system.

Considerations in Airway Management for Maxillofacial Trauma

Scenario 1 View Scenario X

A 32 year old male passenger was found responsive and conscious in the backseat by paramedics after his friend's car veers off the road and strikes a wall.

The patient presents with the following vitals:  
C-spine collar is in place. He opens his eyes to painful stimuli, makes incomprehensible sounds, and withdraws from painful stimuli.  
BP: 117/70 HR: 117  
O<sub>2</sub>: 96% on 6L face mask O<sub>2</sub>, fiO<sub>2</sub> - 50% RR: 14

He has extensive bruising to his face secondary to airbag release and mandibular fracture. His nasal region is mobile from the rest of his maxilla/ peri orbital region. There is blood from his nose and mouth, which persists after nasal packing and suctioning.

Question: patient need to be intubated based on his present condition?

New info: There is no gag response to suctioning and breathing is shallow

Yes No

< PREV NEXT >

fig ii. Screenshot of case information for facial trauma module.

## Considerations in Airway Management for Maxillofacial Trauma

[View Scenario](#)

**New info: There is no gag response to suctioning and breathing is shallow**

The patient presents with the following vitals:

BP: 157/82

HR: 117

O<sub>2</sub>: 96% on 6L face mask O<sub>2</sub>, fiO<sub>2</sub> - 50%

RR: 14

**Question 3:** Does this patient need to be intubated based on his present condition?

[Yes](#)

[No](#)

[< PREV](#)

[NEXT >](#)

fig iii. Screenshot of questions for facial trauma module.
